# Supplementary material
Source: MDPI journal article supplement (https://www.mdpi.com/2311-7524/10/3/228)
Supplement: s1 [file s1]

**Table S1:** Description of isolates of *Fusarium oxysporum* f. sp. *cubense* from Brazil used in the study to assess the presence of genes secreted in xylem (SIX) and levels of aggressiveness and virulence. Embrapa, Brazil, 2020.

| Isolate* | State          | City                   | Cultivar       | Subgroup  | Geographic coordinates             |
|----------|----------------|------------------------|----------------|-----------|------------------------------------|
| 194A     | São Paulo      | Sete Barras            | Prata-Anã      | Prata     | 24° 24' 1.61"S / 47° 55' 7.56"W    |
| 206A     | São Paulo      | Pariquera Açu          | Prata-Anã      | Prata     | 24° 36' 4.28"S / 47° 53' 5.00"W    |
| 218A     | São Paulo      | Eldorado               | Nanica         | Cavendish | 24° 38' 5.26"S / 48° 11' 0.35"W    |
| 220A     | São Paulo      | Pedro de Toledo        | Nanica         | Cavendish | 24° 17' 4.63"S / 47° 14' 3.92"W    |
| 221A     | São Paulo      | Pedro de Toledo        | Nanica         | Cavendish | 24° 17' 4.63"S / 47° 14' 3.86"W    |
| 225B     | São Paulo      | Eldorado               | Prata-Anã      | Prata     | 24° 37' 4.47"S / 48° 11' 5.77"W    |
| 228C     | São Paulo      | Vista Grande- Miracatu | Prata-Anã      | Prata     | 24° 19' 5.17"S / 47° 22' 0.04"W    |
| 229A     | São Paulo      | Vista Grande- Miracatu | Prata-Anã      | Prata     | 24° 19' 5.17"S / 47° 22' 0.08"W    |
| 230C     | São Paulo      | Pedro de Toledo        | Prata-Anã      | Prata     | 24° 16' 9.04"S / 47° 12' 1.49"W    |
| 231A     | São Paulo      | Pedro de Toledo        | Prata-Anã      | Prata     | 24° 16' 9.04"S / 47° 12' 1.51"W    |
| 236A     | São Paulo      | Pedro de Toledo        | Prata-Anã      | Prata     | 24° 17' 4.62"S / 47° 14' 5.10"W    |
| 237C     | São Paulo      | Jacupiranga            | Nanica         | Cavendish | 24° 55' 2.50"S / 48° 04' 7.53"W    |
| 238A     | São Paulo      | Jacupiranga            | Nanica         | Cavendish | 24° 55' 2.50"S / 48° 04' 7.21"W    |
| 247A     | São Paulo      | Itariri                | Prata-Anã      | Prata     | 24° 15' 7.14" / 47° 09' 8.83"W     |
| 249C     | São Paulo      | Registro               | Prata Catarina | Prata     | 24° 34' 3.25"S / 47° 50' 9.94"W    |
| 250A     | São Paulo      | Registro               | Prata Catarina | Prata     | 24° 34' 3.25"S / 47° 50' 8.74"W    |
| 262A     | São Paulo      | Sete Barras            | Nanica         | Cavendish | 24° 24' 4.57"S / 47° 56' 8.55"W    |
| 262B     | São Paulo      | Sete Barras            | Nanica         | Cavendish | 24° 24' 4.57"S / 47° 56' 8.55"W    |
| 262C     | São Paulo      | Sete Barras            | Nanica         | Cavendish | 24° 24' 4.57"S / 47° 56' 8.55"W    |
| 264A     | São Paulo      | Sete Barras            | Nanica         | Cavendish | 24° 24' 4.57"S / 47° 56' 7.65"W    |
| 264B     | São Paulo      | Sete Barras            | Nanica         | Cavendish | 24° 24' 4.57"S / 47° 56' 7.65"W    |
| 270A     | São Paulo      | Miracatu               | Nanicão        | Cavendish | 24° 19' 9.45"S / 47° 22' 4.03"W    |
| 270B     | São Paulo      | Miracatu               | Nanicão        | Cavendish | 24° 19' 9.45"S / 47° 22' 4.03"W    |
| 270C     | São Paulo      | Miracatu               | Nanicão        | Cavendish | 24° 19' 9.45"S / 47° 22' 4.03"W    |
| 284A     | São Paulo      | Registro               | Prata-Anã      | Prata     | 24° 34' 5.21"S / 47° 50' 8.26"W    |
| 284C     | São Paulo      | Registro               | Prata-Anã      | Prata     | 24° 34' 5.21"S / 47° 50' 7.76"W    |
| 287B     | Santa Catarina | Corupá-Rio Novo        | Prata-Anã      | Prata     | 26° 25' 35.562"S / 49° 17' 8.088"W |
| 289C     | Santa Catarina | Corupá-Rio Novo        | Prata-Anã      | Prata     | 26° 25' 41.354"S / 49° 17' 1.742"W |
| 290B     | Santa Catarina | Corupá-Isabel          | Nanica         | Cavendish | 26° 28' 43"S / 49° 17' 47"W        |
| 293A     | Santa Catarina | Corupá-Isabel          | Prata-Anã      | Prata     | 26° 28' 43"S / 49° 17' 53"W        |
| 293B     | Santa Catarina | Corupá-Isabel          | Prata-Anã      | Prata     | 26° 28' 43"S / 49° 17' 53"W        |
| 294C     | Santa Catarina | Corupá-Rio Novo        | Prata-Anã      | Prata     | 26° 24' 49"S / 49° 17' 55"W        |
| 296B     | Santa Catarina | Corupá-Isabel          | Prata-Anã      | Prata     | 26° 28' 43"S / 49° 17' 52"W        |
| 296C     | Santa Catarina | Corupá-Isabel          | Prata-Anã      | Prata     | 26° 28' 43"S / 49° 17' 52"W        |
| 298A     | Santa Catarina | Corupá-Isabel          | Nanica         | Cavendish | 26° 28' 43"S / 49° 17' 48"W        |

**Table S1:** Continuation.

| Isolate* | State          | City            | Cultivar  | Subgroup  | Geographic coordinates             |
|----------|----------------|-----------------|-----------|-----------|------------------------------------|
| 298B     | Santa Catarina | Corupá-Isabel   | Nanica    | Cavendish | 26° 28' 43"S / 49° 17' 48"W        |
| 298C     | Santa Catarina | Corupá-Isabel   | Nanica    | Cavendish | 26° 28' 43"S / 49° 17' 48"W        |
| 299C     | Santa Catarina | Corupá-Isabel   | Nanica    | Cavendish | 26° 28' 43"S / 49° 17' 51"W        |
| 300A     | Santa Catarina | Corupá-Rio Novo | Nanica    | Cavendish | 26° 25' 41.234"S / 49° 17' 1.890"W |
| 301A     | Santa Catarina | Corupá-Isabel   | Prata-Anã | Prata     | 26° 26' 31"S / 49° 10' 52"W        |
| 301B     | Santa Catarina | Corupá-Isabel   | Prata-Anã | Prata     | 26° 26' 31"S / 49° 10' 52"W        |
| 301C     | Santa Catarina | Corupá-Isabel   | Prata-Anã | Prata     | 26° 26' 31"S / 49° 10' 52"W        |
| 302C     | Santa Catarina | Corupá-Rio Novo | Nanica    | Cavendish | 26° 24' 47.562"S / 49° 17' 5.166"W |
| 304A     | Santa Catarina | Corupá-Rio Novo | Nanica    | Cavendish | 26° 24' 47.453"S / 49° 17' 5.300"W |
| 305A     | Santa Catarina | Corupá          | Nanica    | Cavendish | 26° 25' 45"S / 49° 17' 15"W        |
| 305C     | Santa Catarina | Corupá          | Nanica    | Cavendish | 26° 25' 45"S / 49° 17' 15"W        |
| 306A     | Santa Catarina | Corupá-Rio Novo | Nanica    | Cavendish | 26° 25' 4.354"S / 49° 17' 1.762"W  |
| 306B     | Santa Catarina | Corupá-Rio Novo | Nanica    | Cavendish | 26° 25' 41.354"S / 49° 17' 1.853"W |
| 307A     | Santa Catarina | Corupá-Rio Novo | Prata-Anã | Prata     | 26° 24' 46.345"S / 49° 17' 6.234"W |
| 307B     | Santa Catarina | Corupá-Rio Novo | Prata-Anã | Prata     | 26° 24' 46.345"S / 49° 17' 6.234"W |
| 307C     | Santa Catarina | Corupá-Rio Novo | Prata-Anã | Prata     | 26° 24' 46.345"S / 49° 17' 6.234"W |
| 0801     | Bahia          | Cruz das Almas  | Maçã      | Maça      | 12° 40' 38.1"S / 39° 05' 25.2"W    |

\* The numbers represent the property from which the isolate was collected and the letter symbolizes the different locations within a property.
