# Supplementary material
Source: MDPI journal article supplement (https://www.mdpi.com/2311-7524/10/3/228)
Supplement: s1 [file s1]

**Table S3:** Classification of aggressiveness and virulence of 52 isolates of *Fusarium oxysporum* f. sp. *cubense* from Brazil in the cultivars "Prata-Anã" and "Grande Naine" based on the internal disease index.

| Isolated | DI (Prata-Anã) <sup>1</sup> | DI (Grande Naine) <sup>1</sup> | Classification <sup>2</sup>                              |
|----------|-----------------------------|--------------------------------|----------------------------------------------------------|
| 289C     | 83,3 a                      | 41,6 a                         | HIGH AGGRESSIVENESS AND VIRULENCE                        |
| 262B     | 83,3 a                      | 37,5 b                         |                                                          |
| 264A     | 79,1 a                      | 58,3 a                         |                                                          |
| 298C     | 87,5 a                      | 41,6 a                         |                                                          |
| 306A     | 79,1 a                      | 45,8 a                         |                                                          |
| 218A     | 100 a                       | 45,8 a                         |                                                          |
| 229A     | 75 a                        | 41,6 a                         |                                                          |
| 262C     | 62,5 b                      | 37,5 b                         |                                                          |
| 262A     | 62,5 b                      | 45,8 a                         |                                                          |
| 300A     | 58,3 b                      | 45,8 a                         |                                                          |
| 305C     | 54,1 b                      | 45,8 a                         |                                                          |
| 221A     | 95,8 a                      | 0 c                            | AVIRULENTS FOR GRANDE NAINÉ AND AGGRESSIVE FOR PRATA-ANÃ |
| 220A     | 95,8 a                      | 0 c                            |                                                          |
| 293B     | 95,8 a                      | 0 c                            |                                                          |
| 307C     | 95,8 a                      | 0 c                            |                                                          |
| 0801     | 95,8 a                      | 0 c                            |                                                          |
| 230C     | 87,5 a                      | 0 c                            |                                                          |
| 301C     | 87,5 a                      | 0 c                            |                                                          |
| 231A     | 83,3 a                      | 0 c                            |                                                          |
| 194A     | 87,5 a                      | 4,1 c                          |                                                          |
| 284C     | 79,1 a                      | 4,1 c                          |                                                          |
| 206A     | 79,1 a                      | 8,3 c                          |                                                          |
| 250A     | 62,5 b                      | 0 c                            | MODERATE AGGRESSIVENESS AND VIRULENCE                    |
| 249C     | 66,6 b                      | 0 c                            |                                                          |
| 284A     | 54,1 b                      | 0 c                            |                                                          |
| 247A     | 66,6 b                      | 0 c                            |                                                          |
| 228C     | 62,5 b                      | 0 c                            |                                                          |
| 307B     | 70,8 b                      | 0 c                            |                                                          |
| 302C     | 70,8 b                      | 12,5 c                         |                                                          |
| 236A     | 66,6 b                      | 8,3 c                          |                                                          |
| 264B     | 66,6 b                      | 8,3 c                          |                                                          |
| 238A     | 58,3 b                      | 33,3 b                         |                                                          |
| 270B     | 54,1 b                      | 25 b                           |                                                          |
| 293A     | 45,8 b                      | 12,5 c                         |                                                          |
| 298B     | 66,6 b                      | 25 b                           |                                                          |
| 299C     | 58,3 b                      | 25 b                           |                                                          |
| 237C     | 50 b                        | 0 c                            |                                                          |
| 307A     | 54,1 b                      | 0 c                            |                                                          |
| 290B     | 50 b                        | 8,3 c                          |                                                          |
| 305A     | 50 b                        | 16,6 c                         |                                                          |
| 270C     | 33,3 c                      | 0 c                            |                                                          |

**Supplementary Table S3:** Continuation.

| Isolated | DI (Prata-Anã) <sup>1</sup> | DI (Grande Naine) <sup>1</sup> | Classification <sup>2</sup>      |
|----------|-----------------------------|--------------------------------|----------------------------------|
| 225B     | 25 c                        | 0 c                            | LOW AGGRESSIVENESS AND AVIRULENT |
| 306B     | 37,5 c                      | 4,1 c                          |                                  |
| 296C     | 20,8 c                      | 0 c                            |                                  |
| 301B     | 8,3 c                       | 0 c                            |                                  |
| 287B     | 4,1 c                       | 0 c                            |                                  |
| 270A     | 25 c                        | 0 c                            |                                  |
| 304A     | 12,5 c                      | 12,5 c                         |                                  |
| 296B     | 8,3 c                       | 0 c                            |                                  |
| 298A     | 0 c                         | 0 c                            |                                  |
| 294C     | 0 c                         | 0 c                            |                                  |
| 301A     | 0 c                         | 0 c                            |                                  |

<sup>1</sup> Disease indices (DI) followed by the same letter (in the column) do not differ statistically by the Scott-Knott test ( $p < 0.05$ ). <sup>2</sup> Classes of reaction to the disease based on a cluster analysis shown in Figure 2.
