# Supplementary material
Source: MDPI journal article supplement (https://www.mdpi.com/2311-7524/10/3/228)
Supplement: s1 [file s1]

**Table S2:** Analysis of variance for internal indexes of Fusarium wilt symptoms (ID) in the cultivars Prata-anã and Grande Naine based on the rhizome vascular discoloration, 85 days after inoculation in greenhouse with 52 isolates of *Fusarium oxysporum* f. sp. *cubense*.

|                    | Df  | Sum Sq | Mean sq | F value   | Pr(>F)           |
|--------------------|-----|--------|---------|-----------|------------------|
| Cultivar           | 1   | 152596 | 152596  | 4.568.276 | < 2.2e-16 ***    |
| Isolated           | 51  | 121571 | 2384    | 71.362    | < 2.2e-16 ***    |
| Cultivar: isolated | 51  | 62091  | 1217    | 36.448    | 0,00000002741*** |
| Residuals          | 208 | 69479  | 334     |           |                  |
| Total              | 311 | 405737 |         |           |                  |
| CV = 49,8          |     |        |         |           |                  |

\*\*\* Significantly different in the 0.001 probability levels by the F test.
